# Supplementary material
Source: publisher figshare collection journal article supplement (https://gsajournals.figshare.com/ndownloader/files/26480468)
Supplement: Supplementary file 1 [file 26480468]

## Sheet: Sheet1
Affy SNP ID	p8-G01_Skamania	p8-H01_Skookumchuck	p8-D02_Touchet	p8-B01_Clearwater	p8-C01_Klamath	p8-C02_Swanson	p8-A02_Whale_Rock_Female	p8-B02_Whale_Rock_Male	p8-D01_Golden_Male	p8-F01_OSU	p8-E01_Hot_Creek	p8-A01_Arlee
Affx-88940536	AA	AA	AA	AA	AA	AA	GG	GG	GG	GG	GG	GG
Affx-88943126	TT	TT	TT	TT	TT	TT	CC	CC	CC	CC	CC	CC
Affx-88954581	TT	TT	TT	TT	TT	TT	CC	CC	CC	CC	CC	CC
Affx-88933863	CC	CC	CC	CC	CC	CC	TT	TT	TT	TT	TT	TT
Affx-88925982	AA	AA	AA	AA	AA	AA	GG	GG	GG	GG	GG	GG
Affx-88956424	CC	AA	CC	CC	AA	CC	AA	AA	AA	AA	AA	AA
Affx-88917470	GG	GG	GG	GG	GG	GG	AA	AA	AA	AA	AA	AA
Affx-88908509	---	TT	TT	TT	TT	TT	---	CC	CC	CC	CC	CC
Affx-88950426	AA	AA	AA	AA	AA	AA	CC	CC	CC	CC	CC	CC
Affx-88945819	AA	AA	AA	AA	AA	AA	CC	CC	CC	CC	CC	CC
Affx-88912634	GG	GG	GG	GG	GG	GG	TT	TT	TT	TT	TT	TT
Affx-88949098	GG	GG	GG	GG	GG	GG	AA	AA	AA	AA	AA	AA
Affx-88931399	TT	TT	TT	TT	TT	TT	CC	CC	CC	CC	CC	CC
Affx-88906120	CC	CC	CC	CC	CC	CC	AA	AA	AA	AA	AA	AA
Affx-88917987	AA	AA	AA	AA	AA	AA	CC	CC	CC	CC	CC	CC
Affx-88927500	TT	TT	TT	TT	TT	TT	CC	CC	CC	CC	CC	CC
Affx-88939746	CC	CC	CC	CC	CC	CC	TT	TT	TT	TT	TT	TT
Affx-88936243	AA	AA	AA	AA	AA	AA	GG	GG	GG	GG	GG	GG
Affx-88947146	AA	AA	AA	AA	AA	AA	GG	GG	GG	GG	GG	GG
Affx-88923804	---	CC	CC	CC	CC	CC	TT	TT	TT	TT	TT	TT
Affx-88933162	AA	AA	AA	AA	AA	AA	---	CC	CC	CC	CC	CC
Affx-88916075	AA	AA	AA	AA	AA	AA	CC	CC	CC	CC	CC	CC
Affx-88956810	TT	TT	TT	TT	TT	TT	GG	GG	GG	GG	GG	GG
Affx-88958880	TT	TT	TT	TT	CC	TT	CC	CC	CC	CC	CC	CC
Affx-88906605	AA	AA	AA	AA	AA	AA	CC	CC	CC	CC	CC	CC
Affx-88961502	AA	AA	AA	AA	AA	AA	GG	GG	GG	GG	GG	GG
Affx-88958506	TT	TT	TT	TT	TT	TT	CC	CC	CC	CC	CC	CC
Affx-88925321	GG	GG	GG	GG	GG	GG	TT	TT	TT	TT	TT	TT
Affx-88926669	AA	AA	AA	AA	AA	AA	GG	GG	GG	GG	GG	GG
Affx-88948976	TT	TT	TT	TT	TT	TT	CC	CC	CC	CC	CC	CC
Affx-88909986	CC	CC	TC	CC	CC	CC	TT	TT	TT	TT	TT	TT
Affx-88916301	CC	CC	CC	CC	CC	CC	TT	TT	TT	TT	TT	TT
Affx-88944611	TT	TT	TT	TT	TT	TT	CC	CC	CC	CC	CC	CC
Affx-88956934	GG	GG	GG	GG	GG	GG	TT	TT	TT	TT	TT	TT
Affx-88932291	CC	CC	CC	CC	CC	CC	TT	TT	TT	TT	TT	TT
Affx-88943601	AA	AA	AA	AA	AA	AA	GG	GG	GG	GG	GG	GG
Affx-88907646	GG	GG	---	GG	GG	GG	AA	AA	AA	AA	AA	AA
Affx-88932470	GG	GG	GG	GG	GG	GG	AA	AA	AA	AA	AA	AA
Affx-88939284	CC	CC	CC	CC	CC	CC	TT	TT	TT	TT	TT	TT
Affx-88960658	CC	CC	CC	CC	CC	CC	---	AC	AA	AA	AA	AA
Affx-88920779	CC	CC	CC	CC	CC	CC	TT	TT	TT	TT	TT	TT
Affx-88925254	GG	GG	GG	GG	GG	GG	AA	AA	AA	AA	AA	AA
Affx-88915147	CC	CC	CC	CC	TT	CC	TT	TT	TT	TT	TT	TT
Affx-88911013	TT	TT	TT	TT	TT	TT	CC	CC	CC	CC	CC	CC
Affx-88945744	AA	AA	AA	AA	AA	AA	GG	GG	GG	GG	GG	GG
Affx-88958414	AA	AA	AA	AA	AA	AA	GG	GG	GG	GG	GG	GG
Affx-88948808	CC	CC	CC	CC	CC	CC	TT	TT	TT	TT	TT	TT
Affx-88953478	CC	CC	CC	CC	CC	CC	TT	TT	TT	TT	TT	TT
Affx-88908073	AA	AA	AA	AA	CC	AA	CC	CC	CC	CC	CC	CC
Affx-88927621	GG	GG	GG	GG	GG	GG	AA	AA	AA	AA	AA	AA
Affx-88955916	TT	CC	CC	CC	TT	CC	TT	TT	TT	TT	TT	TT
Affx-88923303	GG	TT	GG	GG	GG	GG	TT	TT	TT	TT	TT	TT
Affx-88959784	TT	TT	TT	TT	TT	TT	CC	CC	CC	CC	CC	CC
Affx-88946794	AA	AA	AA	AA	AA	AA	CC	CC	CC	CC	CC	CC
Affx-88959462	AA	AA	AA	AA	AA	AA	CC	CC	CC	CC	CC	CC
Affx-88959808	CC	CC	CC	CC	CC	CC	AA	AA	AA	AA	AA	AA
Affx-88926075	TT	TT	TT	TT	TT	TT	CC	CC	CC	CC	CC	CC
Affx-88922993	AA	AA	AA	AA	AA	AA	GG	GG	GG	GG	GG	GG
Affx-88916760	TT	TT	TT	TT	TT	TT	---	GG	GG	GG	GG	GG
Affx-88952352	GG	GG	GG	GG	GG	GG	TT	TT	TT	TT	TT	TT
Affx-88960520	GG	GG	GG	GG	GG	GG	TT	TT	TT	---	TT	TT
Affx-88943549	CC	CC	CC	CC	CC	CC	AA	AA	AA	AA	AA	AA
Affx-88932252	TT	TT	TT	TT	TT	TT	GG	GG	GG	GG	GG	GG
Affx-88920950	CC	CC	CC	CC	CC	CC	TT	TT	TT	TT	TT	TT
Affx-88910523	AA	AA	AA	AA	AA	AA	CC	CC	CC	CC	CC	CC
Affx-88909117	TT	TT	TT	TT	TT	TT	GG	GG	GG	GG	GG	GG
Affx-88929707	TT	TT	TT	TT	TT	TT	CC	CC	CC	CC	CC	CC
Affx-88959296	TT	TT	TT	TT	TT	TT	GG	GG	GG	GG	GG	GG
Affx-88923995	AA	AA	AA	AA	AA	AA	GG	GG	GG	GG	GG	GG
Affx-88905096	GG	GG	GG	GG	GG	GG	AA	AA	AA	AA	AA	AA
Affx-88916685	AA	AA	AA	AA	AA	AA	GG	GG	GG	GG	GG	GG
Affx-88921610	GG	GG	GG	GG	GG	GG	AA	AA	AA	AA	AA	AA
Affx-88929432	GG	GG	GG	GG	GG	GG	AA	AA	AA	AA	AA	AA
Affx-88936877	GG	GG	GG	GG	GG	GG	TT	TT	TT	TT	TT	TT
Affx-88938585	CC	TT	CC	CC	TT	CC	TT	TT	TT	TT	TT	TT
Affx-88928649	TT	TT	TT	TT	TT	TT	CC	CC	CC	CC	CC	CC
Affx-88924995	CC	CC	CC	CC	CC	CC	TT	TT	TT	TT	TT	TT
Affx-88951138	GG	GG	GG	GG	GG	GG	AA	AA	AA	AA	AA	AA
Affx-88925799	CC	CC	CC	CC	CC	CC	TT	TT	TT	TT	TT	TT
Affx-88919461	TT	TT	TT	TT	TT	TT	CC	CC	CC	CC	CC	CC
Affx-88907732	GG	GG	GG	GG	GG	GG	TT	TT	TT	TT	TT	TT
Affx-88924840	AA	AA	AA	AA	AA	AA	GG	GG	GG	GG	GG	GG
Affx-88943495	TT	TT	TT	TT	TT	TT	CC	CC	CC	CC	CC	CC
Affx-88939189	TT	TT	TT	TT	TT	TT	GG	GG	GG	GG	GG	GG
Affx-88939091	CC	CC	CC	CC	CC	CC	TT	TT	TT	TT	TT	TT
Affx-88909125	GG	GG	GG	GG	GG	GG	AA	AA	AA	AA	AA	AA
Affx-88944741	CC	CC	CC	CC	CC	CC	AA	AA	AA	AA	AA	AA
Affx-88926313	TT	TT	TT	TT	CC	TT	CC	CC	CC	CC	CC	CC
Affx-88955067	GG	GG	GG	GG	GG	GG	TT	TT	TT	TT	TT	TT
Affx-88954949	CC	CC	CC	CC	CC	CC	TT	TT	TT	TT	TT	TT
Affx-88915738	TT	TT	TT	TT	TT	TT	GG	GG	GG	GG	GG	GG
Affx-88918352	TT	TT	TT	TT	CC	TT	CC	CC	CC	CC	CC	CC
Affx-88919770	TT	TT	TT	TT	TT	TT	CC	CC	CC	CC	CC	CC
Affx-88947426	AA	AA	GG	AA	GG	AA	GG	GG	GG	GG	GG	GG
Affx-88958224	AA	AA	AA	AA	AA	AA	CC	CC	CC	CC	CC	CC
Affx-88951943	GG	GG	GG	GG	GG	GG	TT	---	TG	TT	TG	TT
Affx-88910911	AA	AA	AA	AA	AA	AA	CC	CC	CC	CC	CC	CC
Affx-88915314	AA	AA	AA	AA	AA	AA	GG	GG	GG	GG	GG	GG
Affx-88950557	TT	TT	TT	TT	TT	TT	CC	CC	CC	CC	CC	CC
Affx-88955300	CC	CC	TT	TT	CC	TT	CC	CC	CC	CC	CC	CC
Affx-88908544	CC	CC	CC	CC	CC	CC	TT	TT	TT	TT	TT	TT
Affx-88937936	CC	CC	CC	CC	CC	CC	TT	TT	TT	TT	TT	TT
Affx-88936769	TT	TT	TT	TT	TT	TT	CC	CC	CC	CC	CC	CC
Affx-88923645	GG	GG	GG	GG	GG	GG	AA	AA	AA	AA	AA	AA
Affx-88939690	TT	TT	TT	TT	TT	TT	GG	GG	GG	GG	GG	GG
Affx-88908000	TT	TT	TT	TT	TT	TT	CC	CC	CC	CC	CC	CC
Affx-88936145	AA	AA	AA	AA	AA	AA	GG	GG	GG	GG	GG	GG
Affx-88920444	CC	CC	CC	---	CC	CC	TT	TT	TT	TT	TT	TT
Affx-88930590	TT	TT	TT	TT	TT	TT	CC	CC	CC	CC	CC	CC
Affx-88906316	AA	AA	AA	AA	AA	AA	CC	CC	CC	CC	CC	CC
Affx-88943592	TT	TT	TT	TT	TT	TT	AA	AA	AA	AA	AA	AA
Affx-88931449	AA	AA	AA	AA	AA	AA	GG	GG	GG	GG	GG	GG
Affx-88954885	GG	GG	GG	GG	GG	GG	TT	TT	TT	TT	TT	TT
Affx-88949056	TT	TT	TT	TT	TT	TT	CC	CC	CC	CC	CC	CC
Affx-88934237	CC	CC	CC	CC	CC	CC	AA	AA	AA	AA	AA	AA
Affx-88919920	GG	GG	GG	GG	GG	GG	TT	TT	TT	TT	TT	TT
Affx-88917718	AA	AA	AA	AA	AA	AA	GG	GG	GG	GG	GG	GG
Affx-88939029	AA	AA	AA	AA	AA	AA	GG	GG	GG	GG	GG	GG
Affx-88949671	AA	AA	AA	AA	AA	AA	GG	GG	GG	GG	GG	GG
Affx-88919345	AA	AA	AA	AA	AA	AA	TT	TT	---	TT	TT	---
Affx-88910706	AA	AA	AA	AA	AA	AA	CC	CC	CC	CC	CC	CC
Affx-88924528	AA	AA	AA	AA	GG	AA	GG	GG	GG	GG	GG	GG
Affx-88941035	TT	TT	TT	TT	TT	TT	GG	GG	GG	GG	GG	GG
Affx-88940519	TT	TT	TT	TT	TT	TT	GG	GG	GG	GG	GG	GG
Affx-88954874	AA	AA	AA	AA	AA	AA	GG	---	GG	GG	GG	GG
Affx-88913414	GG	GG	GG	GG	GG	GG	TT	TT	TT	TT	TT	TT
Affx-88955242	GG	GG	GG	GG	GG	GG	TT	TT	TT	TT	TT	TT
Affx-88943543	GG	GG	GG	GG	GG	GG	AA	AA	AA	AA	AA	AA
Affx-88939821	TT	TT	TT	TT	TT	TT	CC	CC	CC	CC	CC	CC
Affx-88909232	AA	AA	AA	AA	AA	AA	GG	GG	GG	GG	GG	GG
Affx-88929801	CC	CC	CC	CC	CC	CC	TT	TT	TT	TT	TT	TT
Affx-88921291	AA	AA	AA	AA	CC	AA	CC	CC	CC	CC	CC	CC
Affx-88927036	AA	AA	AA	AA	AA	AA	GG	GG	GG	GG	GG	GG
Affx-88906142	TT	TT	TT	TT	TT	TT	GG	GG	GG	GG	GG	GG
Affx-88938628	TT	TT	TT	TT	TT	TT	CC	CC	CC	CC	CC	CC
Affx-88918226	AA	AA	AA	AA	AA	AA	GG	GG	GG	GG	GG	GG
Affx-88933338	TT	TT	TT	TT	TT	TT	CC	CC	CC	CC	CC	CC
Affx-88938303	AA	AA	AA	AA	AA	AA	CC	CC	CC	CC	CC	CC
Affx-88950525	CC	CC	CC	CC	CC	CC	AA	AA	AA	AA	AA	AA
Affx-88925807	TT	TT	TT	TT	CC	TT	CC	CC	CC	CC	CC	CC
Affx-88928059	AA	AA	AA	AA	AA	AA	CC	CC	CC	CC	CC	CC
Affx-88956338	AA	AA	AA	AA	AA	AA	GG	GG	GG	GG	GG	GG
Affx-88949724	CC	CC	CC	CC	CC	CC	AA	AA	AA	AA	AA	AA
Affx-88918704	TT	TT	TT	TT	TT	TT	CC	CC	CC	CC	CC	CC
Affx-88953078	GG	GG	GG	GG	GG	GG	---	AA	AA	AA	AA	AA
Affx-88927542	TT	TT	TT	TT	TT	TT	CC	CC	CC	CC	CC	CC
Affx-88920613	AA	AA	AA	AA	AA	AA	GG	GG	GG	GG	GG	GG
Affx-88944457	GG	GG	GG	GG	GG	GG	CC	CC	CC	CC	CC	CC
Affx-88939907	TT	TT	TT	TT	TT	TT	CC	CC	CC	CC	CC	CC
Affx-88933398	AA	AA	AA	AA	AA	AA	GG	GG	GG	GG	GG	GG
Affx-88957870	GG	GG	GG	GG	GG	GG	AA	AA	AA	AA	AA	AA
Affx-88932295	AA	AA	AA	AA	AA	AA	GG	GG	GG	GG	GG	GG
Affx-88909191	AA	AA	AA	AA	AA	AA	GG	GG	GG	GG	GG	GG
Affx-88931786	CC	CC	CC	CC	CC	CC	TT	TT	TT	TT	TT	TT
Affx-88929746	AA	AA	AA	AA	AA	AA	GG	GG	GG	GG	GG	GG
Affx-88957148	AA	AA	AA	AA	AA	AA	CC	CC	CC	CC	CC	CC
Affx-88936940	TT	TT	TT	TT	TT	TT	GG	GG	GG	GG	GG	GG
Affx-88905091	TT	TT	TT	TT	TT	TT	GG	GG	GG	GG	GG	GG
Affx-88927975	TT	TT	TT	TT	TT	TT	CC	CC	CC	CC	CC	CC
Affx-88923356	TT	TT	TT	TT	TT	TT	CC	CC	CC	CC	CC	CC
Affx-88956098	TT	TT	TT	TT	TT	TT	CC	CC	CC	CC	CC	CC
Affx-88931506	GG	GG	GG	GG	GG	GG	AA	AA	AA	AA	AA	AA
Affx-88958812	AA	AA	AA	AA	AA	AA	GG	GG	GG	GG	GG	GG
Affx-88954629	CC	CC	CC	CC	CC	CC	AA	AA	AA	AA	AA	AA
Affx-88929512	TT	TT	TT	TT	TT	TT	GG	GG	GG	GG	GG	GG
Affx-88954911	AA	AA	AA	AA	AA	AA	GG	GG	GG	GG	GG	GG
Affx-88958875	AA	AA	AA	AA	AA	AA	CC	CC	CC	CC	CC	CC
Affx-88919738	AA	AA	AA	AA	AA	AA	GG	GG	GG	GG	GG	GG
Affx-88956904	GG	GG	GG	GG	GG	GG	AA	AA	AA	AA	AA	AA
Affx-88934014	CC	CC	CC	CC	CC	CC	TT	TT	TT	TT	TT	TT
Affx-88906550	TT	TT	TT	TT	TT	TT	CC	CC	CC	CC	CC	CC
Affx-88961564	GG	GG	GG	GG	GG	GG	AA	AA	AA	AA	AA	AA
Affx-88957674	GG	GG	GG	GG	GG	GG	TT	TT	TT	TT	TT	TT
Affx-88945117	CC	CC	CC	CC	CC	CC	AA	AA	AA	AA	AA	AA
Affx-88932263	AA	AA	AA	AA	AA	AA	GG	GG	GG	GG	GG	GG
Affx-88959526	AA	AA	AA	AA	AA	AA	GG	GG	GG	GG	GG	GG
Affx-88961608	GG	GG	GG	GG	GG	GG	AA	AA	AA	AA	AA	AA
Affx-88959498	TT	TT	TT	TT	TT	TT	CC	CC	CC	CC	CC	CC
Affx-88958910	CC	CC	CC	CC	CC	CC	TT	TT	TT	TT	TT	TT
Affx-88935971	CC	CC	CC	CC	CC	CC	AA	AA	AA	AA	AA	AA
Affx-88935435	AA	AA	AA	AA	AA	AA	CC	CC	CC	CC	CC	CC
Affx-88955238	AA	AA	AA	AA	AA	AA	GG	GG	GG	GG	GG	GG
Affx-88954795	GG	GG	GG	GG	GG	GG	AA	AA	AA	AA	AA	AA
Affx-88943419	AA	AA	AA	AA	AA	AA	GG	GG	GG	GG	GG	GG
Affx-88919078	CC	CC	CC	CC	CC	CC	TT	TT	TT	TT	TT	---
Affx-88917693	AA	AA	AA	AA	AA	AA	CC	CC	CC	CC	CC	CC
Affx-88944581	AA	AA	AA	AA	CC	AA	CC	CC	CC	CC	CC	CC
Affx-88927683	TT	TT	TT	TT	CC	TT	CC	CC	CC	CC	CC	CC
Affx-88925764	TT	TT	TT	TT	CC	TT	CC	CC	CC	CC	CC	CC
Affx-88940150	AA	AA	AA	AA	CC	AA	CC	CC	CC	CC	CC	CC
Affx-88939554	CC	CC	CC	CC	CC	---	TT	TT	TT	TT	TT	TT
Affx-88914578	TT	TT	TT	TT	TT	TT	CC	CC	CC	CC	CC	CC
Affx-88913988	AA	AA	AA	AA	AA	AA	GG	GG	GG	GG	GG	GG
Affx-88958794	CC	CC	CC	CC	CC	CC	TT	TT	TT	TT	TT	TT
Affx-88955164	AA	AA	AA	AA	AA	AA	CC	---	CC	CC	CC	CC
Affx-88948642	TT	TT	TT	TT	TT	TT	CC	CC	CC	CC	CC	CC
Affx-88953991	GG	GG	GG	GG	GG	GG	AA	AA	AA	AA	AA	AA
Affx-88930152	CC	CC	CC	CC	CC	CC	TT	TT	TT	TT	TT	TT
Affx-88959558	GG	GG	GG	GG	AA	GG	---	AA	AA	AA	AA	AA
Affx-88941896	TT	TT	TT	TT	TT	TT	CC	CC	CC	CC	CC	CC
Affx-88928420	CC	CC	CC	CC	CC	CC	AA	AA	AA	AA	AA	AA
Affx-88909748	AA	AA	AA	AA	AA	AA	AA	GG	GG	GG	GG	GG
Affx-88930540	GG	GG	GG	GG	GG	GG	AA	AA	AA	AA	AA	AA
Affx-88918996	AA	AA	AA	AA	AA	AA	GG	GG	GG	GG	GG	GG
Affx-88917435	CC	CC	CC	CC	CC	CC	TT	TT	TT	TT	TT	TT
Affx-88955010	TT	TT	TT	TT	TT	TT	CC	CC	CC	CC	CC	CC
Affx-88936062	TT	CC	CC	CC	CC	CC	TT	TT	TT	TT	TT	TT
Affx-88942278	AA	GG	GG	GG	GG	GG	AA	AA	AA	AA	AA	AA
Affx-88912926	GG	AA	AA	AA	AA	AA	GG	GG	GG	GG	GG	GG
Affx-88947310	AA	AA	AA	AA	AA	AA	GG	GG	GG	GG	GG	GG
Affx-88937413	AA	AA	AA	AA	AA	AA	GG	GG	GG	GG	GG	GG
Affx-88938888	CC	CC	CC	CC	CC	CC	AA	AA	AA	AA	AA	AA
Affx-88923415	AA	AA	AA	AA	AA	AA	CC	CC	CC	CC	CC	CC
Affx-88908908	TT	TT	TT	TT	TT	TT	GG	GG	GG	GG	GG	GG
Affx-88939829	TT	TT	TT	TT	TT	TT	CC	CC	CC	CC	CC	CC
Affx-88928690	TT	TT	TT	TT	TT	TT	CC	CC	CC	CC	CC	CC
Affx-88960892	GG	GG	GG	GG	GG	GG	TT	GG	TT	TT	TT	TT
Affx-88919547	AA	AA	AA	AA	AA	AA	GG	GG	GG	GG	GG	GG
Affx-88917426	AA	AA	AA	AA	AA	AA	GG	GG	GG	GG	GG	GG
Affx-88913858	TT	TT	TT	TT	TT	TT	CC	CC	CC	CC	CC	CC
Affx-88950887	TT	TT	TT	TT	TT	TT	CC	CC	CC	CC	CC	CC
Affx-88950485	TT	TT	TT	TT	TT	TT	GG	GG	GG	GG	GG	GG
Affx-88936183	CC	CC	CC	CC	CC	CC	TT	TT	TT	TT	TT	TT
Affx-88952395	AA	AA	AA	AA	AA	AA	CC	CC	CC	CC	CC	CC
Affx-88928083	TT	TT	TT	TT	TT	TT	CC	CC	CC	---	CC	CC
Affx-88960516	GG	GG	GG	GG	GG	GG	AA	AA	AA	AA	AA	AA
Affx-88932317	TT	TT	TT	TT	TT	TT	CC	CC	CC	CC	CC	CC
Affx-88959070	TT	TT	TT	TT	TT	TT	CC	CC	CC	CC	CC	CC
Affx-88954602	AA	AA	AA	AA	AA	AA	GG	GG	GG	GG	GG	GG
Affx-88921542	CC	CC	CC	CC	CC	CC	TT	TT	TT	TT	TT	TT
Affx-88940695	GG	GG	GG	GG	GG	GG	AA	AA	AA	AA	AA	AA
Affx-88943636	CC	CC	CC	CC	CC	CC	AA	AA	AA	AA	AA	AA
Affx-88925062	TT	TT	TT	TT	TT	TT	CC	CC	CC	CC	CC	CC
Affx-88949114	AA	AA	AA	AA	AA	AA	CC	CC	CC	CC	CC	CC
Affx-88947751	CC	CC	CC	CC	CC	CC	TT	TT	TT	TT	TT	TT
Affx-88909556	GG	GG	GG	GG	GG	GG	TT	TT	TT	TT	TT	TT
Affx-88913403	CC	CC	CC	CC	CC	CC	TT	TT	TT	TT	TT	TT
Affx-88922244	GG	GG	GG	GG	GG	GG	TT	TT	TT	TT	TT	TT
Affx-88959322	GG	GG	GG	GG	GG	GG	AA	AA	AA	AA	AA	AA
Affx-88956534	TT	TT	TT	TT	TT	TT	GG	GG	GG	GG	GG	GG
Affx-88951010	CC	CC	CC	CC	CC	CC	AA	AA	AA	AA	AA	AA
Affx-88915926	AA	AA	AA	AA	AA	AA	GG	GG	GG	GG	GG	GG
Affx-88960068	AA	AA	AA	AA	AA	AA	GG	GG	GG	GG	GG	GG
Affx-88946989	AA	AA	AA	AA	CC	AA	CC	CC	CC	CC	CC	CC
Affx-88920895	AA	AA	AA	AA	AA	AA	CC	CC	CC	CC	CC	CC
Affx-88919666	TT	TT	TT	---	GG	TT	GG	GG	GG	GG	GG	GG
Affx-88955422	CC	CC	CC	CC	CC	CC	AA	AA	AA	AA	AA	AA
Affx-88947093	TT	TT	TT	TT	TT	TT	CC	CC	CC	CC	CC	CC
Affx-88934346	CC	CC	CC	CC	CC	CC	AA	AA	AA	AA	AA	AA
Affx-88953760	TT	TT	TT	TT	TT	TT	CC	CC	CC	CC	CC	CC
Affx-88948279	AA	AA	AA	AA	CC	AA	CC	CC	CC	CC	CC	CC
Affx-88951443	AA	AA	AA	AA	GG	AA	GG	GG	GG	GG	GG	GG
Affx-88960188	TT	TT	TT	TT	CC	TT	CC	CC	CC	CC	CC	CC
Affx-88908618	TT	TT	TT	TT	TT	TT	CC	CC	CC	CC	CC	CC
Affx-88917941	CC	CC	CC	CC	CC	CC	TT	TT	TT	TT	TT	TT
Affx-88923950	GG	GG	GG	GG	GG	GG	TT	TT	TT	TT	TT	TT
Affx-88948658	TT	TT	TT	TT	TT	TT	CC	CC	CC	CC	CC	CC
Affx-88932143	AA	AA	AA	AA	GG	AA	GG	GG	GG	GG	GG	GG
Affx-88909121	TT	TT	TT	TT	TT	TT	GG	GG	GG	GG	GG	GG
Affx-88936811	TT	TT	TT	TT	TT	TT	CC	CC	CC	CC	CC	CC
Affx-88938619	AA	AA	GG	AA	GG	AA	GG	GG	GG	GG	GG	GG
Affx-88935298	AA	AA	AA	AA	AA	AA	CC	CC	CC	CC	CC	CC
Affx-88961666	AA	AA	AA	AA	AA	AA	GG	GG	GG	GG	GG	GG
Affx-88916535	AA	AA	AA	AA	AA	AA	GG	GG	GG	GG	GG	GG
Affx-88907374	GG	GG	GG	GG	GG	GG	TT	TT	TT	TT	TT	TT
Affx-88915212	TT	TT	TT	TT	TT	TT	GG	GG	GG	GG	GG	GG
Affx-88941066	GG	GG	GG	GG	GG	GG	AA	AA	AA	AA	AA	AA
Affx-88946866	AA	AA	AA	AA	AA	AA	CC	CC	CC	CC	CC	CC
Affx-88958512	GG	GG	GG	GG	GG	GG	AA	AA	AA	AA	AA	AA
Affx-88931604	CC	CC	CC	CC	AA	CC	AA	AA	AA	AA	AA	AA
Affx-88956308	AA	AA	AA	AA	GG	AA	GG	GG	GG	GG	GG	GG
Affx-88909578	TC	TT	TT	TT	TT	TT	CC	CC	CC	CC	CC	CC
Affx-88924953	AA	AA	AA	AA	AA	AA	GG	GG	GG	GG	GG	GG
Affx-88932967	TT	TT	TT	TT	TT	TT	CC	CC	CC	CC	CC	CC
Affx-88932381	CC	CC	CC	CC	CC	CC	TT	TT	TT	TT	TT	TT
Affx-88927751	AA	AA	AA	AA	AA	AA	CC	CC	CC	CC	CC	CC
Affx-88913185	TT	TT	TT	TT	CC	TT	CC	CC	CC	CC	CC	CC
Affx-88940139	AA	AA	AA	AA	AA	AA	CC	CC	CC	CC	CC	CC
Affx-88925546	TT	TT	TT	TT	TT	TT	GG	GG	GG	GG	GG	GG
Affx-88944733	AA	AA	AA	AA	GG	AA	GG	GG	GG	---	GG	GG
Affx-88960638	AA	AA	AA	AA	AA	AA	GG	GG	GG	GG	GG	GG
Affx-88958742	CC	CC	CC	CC	TT	CC	TT	TT	TT	TT	TT	TT
Affx-88945812	AA	AA	AA	AA	AA	AA	CC	CC	CC	CC	CC	CC
Affx-88953079	AA	AA	AA	AA	GG	AA	GG	GG	GG	GG	GG	GG
Affx-88955900	GG	GG	GG	GG	GG	GG	TT	TT	TT	TT	TT	TT
Affx-88949422	TT	GG	GG	GG	GG	GG	TT	TT	TT	TT	TT	TT
Affx-88942482	AA	AA	AA	AA	AA	AA	CC	CC	CC	CC	CC	CC
Affx-88924750	AA	AA	AA	AA	AA	AA	GG	GG	GG	GG	GG	GG
Affx-88948486	AA	AA	AA	AA	AA	AA	CC	CC	CC	CC	CC	CC
Affx-88952829	AA	AA	AA	AA	AA	AA	CC	CC	CC	CC	CC	CC
Affx-88956924	AA	AA	AA	AA	AA	AA	CC	CC	CC	CC	CC	CC
Affx-88933024	TT	TT	TT	TT	TT	TT	CC	CC	CC	CC	CC	CC
Affx-88960334	TT	TT	TT	TT	CC	TT	CC	CC	CC	CC	CC	CC
Affx-88942068	CC	CC	CC	CC	TT	CC	TT	TT	TT	TT	TT	TT
Affx-88921113	CC	CC	CC	CC	CC	CC	AA	AA	AA	AA	AA	AA
Affx-88922870	TT	TT	TT	TT	TT	TT	CC	CC	CC	CC	CC	CC
Affx-88908665	TT	TT	TT	TT	TT	TT	CC	CC	CC	CC	CC	CC
Affx-88905457	TT	TT	TT	TT	TT	TT	GG	GG	GG	GG	GG	GG
Affx-88905063	CC	CC	CC	CC	CC	CC	TT	TT	TT	TT	TT	TT
Affx-88908433	CC	CC	CC	CC	TT	CC	TT	TT	TT	TT	TT	TT
Affx-88958574	AA	AA	AA	AA	GG	AA	GG	GG	GG	GG	GG	GG
Affx-88959846	AA	AA	AA	AA	AA	AA	GG	GG	GG	GG	GG	GG
Affx-88959854	AA	AA	AA	AA	AA	AA	GG	GG	GG	GG	GG	GG
Affx-88959830	GG	GG	GG	GG	GG	GG	TT	TT	TT	TT	TT	TT
Affx-88920066	GG	GG	GG	GG	GG	GG	TT	TT	TT	TT	TT	TT
Affx-88936942	GG	AA	GG	GG	GG	GG	AA	AA	AA	AA	AA	AA
Affx-88937646	TT	TT	TT	TT	TT	TT	CC	CC	CC	CC	CC	CC
Affx-88954396	TT	TT	TT	TT	TT	TT	GG	GG	GG	GG	GG	GG
Affx-88915061	CC	CC	CC	CC	CC	CC	TT	TT	TT	TT	TT	TT
Affx-88943065	AA	AA	AA	AA	AA	AA	GG	GG	GG	GG	GG	GG
Affx-88918941	TT	TT	TT	TT	TT	TT	CC	CC	CC	CC	CC	CC
Affx-88932176	GG	GG	GG	GG	GG	GG	AA	AA	AA	AA	AA	AA
Affx-88911338	CC	CC	CC	CC	CC	CC	TT	TT	TT	TT	TT	TT
Affx-88926605	TT	TT	TT	TT	TT	TT	GG	GG	GG	GG	GG	GG
Affx-88921330	AA	AA	AA	AA	AA	AA	GG	GG	GG	GG	GG	GG
Affx-88906195	CC	CC	CC	CC	CC	CC	TT	TT	TT	TT	TT	TT
Affx-88913275	AA	AA	AA	AA	AA	AA	GG	GG	GG	GG	GG	GG
Affx-88947608	AA	AA	AA	AA	AA	AA	GG	GG	GG	GG	GG	GG
Affx-88909361	TT	TT	TT	TT	TT	TT	CC	CC	CC	CC	CC	CC
Affx-88905102	CC	CC	CC	CC	CC	CC	TT	TT	TT	TT	TT	TT
Affx-88913186	GG	GG	GG	GG	GG	GG	AA	AA	AA	AA	AA	AA
Affx-88956082	TT	CC	CC	TT	CC	CC	TT	TT	TT	TT	TT	TT
Affx-88911581	AA	AA	AA	AA	AA	AA	CC	CC	CC	CC	CC	CC
Affx-88923975	GG	GG	GG	GG	GG	GG	TT	TT	TT	TT	TT	TT
Affx-88932980	TT	TT	TT	TT	TT	TT	CC	CC	CC	CC	CC	CC
Affx-88946177	AA	AA	AA	AA	AA	AA	GG	GG	GG	GG	GG	GG
Affx-88918972	GG	GG	GG	GG	GG	GG	TT	TT	TT	TT	TT	TT
Affx-88911457	CC	CC	CC	CC	CC	CC	AA	AA	AA	AA	AA	AA
Affx-88931093	AA	AA	AA	AA	AA	AA	GG	GG	GG	GG	GG	GG
Affx-88904818	AA	AA	AA	AA	AA	AA	GG	GG	GG	GG	GG	GG
Affx-88943408	CC	CC	CC	CC	AA	CC	AA	AA	AA	AA	AA	AA
Affx-88909605	CC	CC	CC	CC	CC	CC	AA	AA	AA	AA	AA	AA
Affx-88938071	TT	TT	TT	TT	TT	TT	GG	---	---	GG	GG	GG
Affx-88957362	TT	---	TT	TT	TT	TT	GG	GG	GG	GG	GG	GG
Affx-88954389	AA	AA	AA	AA	GG	AA	GG	GG	GG	GG	GG	GG
Affx-88957592	TT	TT	TT	TT	TT	TT	CC	CC	CC	CC	CC	CC
Affx-88940602	AA	AA	AA	CC	AA	AA	CC	CC	CC	CC	CC	CC
Affx-88941842	TT	TT	TT	TT	TT	TT	CC	CC	CC	CC	CC	CC
Affx-88953972	GG	GG	GG	GG	GG	GG	AA	AA	AA	AA	AA	AA
Affx-88930812	AA	AA	AA	AA	CC	AA	CC	CC	CC	CC	CC	CC
Affx-88935385	CC	CC	CC	CC	CC	CC	TT	TT	TT	TT	TT	TT
Affx-88920730	TT	TT	---	TT	CC	TT	CC	CC	CC	CC	CC	CC
Affx-88947512	TT	TT	TT	TT	CC	TT	CC	CC	CC	CC	CC	CC
Affx-88956756	CC	CC	CC	CC	CC	CC	AA	AA	AA	AA	AA	AA
Affx-88938561	GG	GG	GG	GG	GG	GG	AA	AA	AA	AA	AA	AA
Affx-88943560	TT	TT	TT	TT	TT	TT	GG	GG	GG	GG	GG	GG
Affx-88960802	GG	GG	GG	GG	GG	GG	TT	TT	TT	TT	TT	TT
Affx-88960972	GG	GG	GG	GG	GG	GG	AA	AA	AA	AA	AA	AA
Affx-88959144	GG	AA	AA	AA	GG	AA	GG	GG	GG	GG	GG	GG
Affx-88936865	GG	GG	GG	GG	GG	GG	TT	TT	TT	TT	TT	TT
Affx-88958926	CC	CC	CC	CC	CC	CC	AA	AA	AA	AA	AA	AA
Affx-88930325	AA	AA	AA	AA	AA	AA	GG	GG	GG	GG	GG	GG
Affx-88952890	AA	AA	AA	AA	AA	AA	GG	GG	GG	GG	GG	GG
Affx-88943120	TT	TT	TT	TT	TT	TT	CC	CC	CC	CC	CC	CC
Affx-88927258	CC	CC	CC	CC	CC	CC	AA	AA	AA	AA	AA	AA
Affx-88936814	AA	AA	AA	AA	AA	AA	---	GG	GG	GG	GG	GG
Affx-88923520	GG	AA	AA	AA	GG	AA	GG	GG	GG	GG	GG	GG
Affx-88933209	AA	AA	AA	AA	AA	AA	GG	GG	GG	GG	GG	GG
Affx-88924956	TT	TT	TT	TT	TT	TT	CC	CC	CC	CC	CC	CC
Affx-88938493	AA	AA	AA	AA	AA	AA	GG	GG	GG	GG	GG	GG
Affx-88947508	TT	TT	TT	TT	TT	TT	GG	GG	GG	GG	GG	GG
Affx-88910657	AA	AA	AA	AA	AA	AA	GG	GG	GG	GG	GG	GG
Affx-88918446	TT	---	TT	TT	TT	TT	GG	GG	GG	GG	GG	GG
Affx-88952733	CC	CC	CC	CC	CC	CC	TT	TT	TT	TT	TT	TT
Affx-88948572	TT	TT	TT	TT	TT	TT	CC	CC	CC	CC	CC	CC
Affx-88960960	AA	AA	AA	AA	AA	AA	CC	CC	CC	CC	CC	CC
Affx-88949831	TT	TT	TT	TT	TT	TT	CC	CC	CC	CC	CC	CC
Affx-88931650	CC	CC	CC	CC	CC	CC	AA	AA	AA	AA	AA	AA
Affx-88943250	AA	AA	AA	AA	AA	AA	GG	GG	GG	GG	GG	GG
Affx-88922238	CC	CC	CC	CC	TT	CC	TT	TT	TT	TT	TT	TT
Affx-88915593	CC	CC	CC	CC	CC	CC	TT	TT	TT	TT	TT	TT
Affx-88943836	TT	TT	TT	TT	TT	TT	GG	GG	GG	GG	GG	GG
Affx-88946191	AA	AA	AA	AA	GG	AA	GG	GG	GG	GG	GG	GG
Affx-88921236	TT	TT	TT	TT	TT	TT	GG	TT	GG	GG	GG	GG
Affx-88911488	GG	GG	---	GG	GG	GG	AA	AA	AA	AA	AA	AA
Affx-88927883	GG	GG	GG	GG	GG	GG	AA	AA	AA	AA	AA	AA
Affx-88956134	GG	GG	GG	GG	GG	GG	AA	AA	AA	AA	AA	AA
Affx-88911863	CC	CC	CC	CC	CC	CC	TT	TT	TT	TT	TT	TT
Affx-88952114	TT	TT	TT	TT	TT	TT	CC	CC	CC	CC	CC	CC
Affx-88944072	GG	GG	GG	GG	GG	GG	AA	AA	AA	AA	AA	AA
Affx-88912515	TT	TT	TT	TT	CC	TT	CC	CC	CC	CC	CC	CC
Affx-88951116	TT	TT	TT	TT	CC	TT	CC	CC	CC	CC	CC	CC
Affx-88929535	AA	AA	AA	AA	GG	AA	GG	GG	GG	GG	GG	GG
Affx-88947671	TT	TT	TT	TT	CC	TT	CC	CC	CC	CC	CC	CC
Affx-88959294	AA	AA	AA	AA	CC	AA	CC	CC	CC	CC	CC	CC
Affx-88918340	AA	AA	CC	AA	AA	AA	CC	CC	CC	CC	CC	CC
Affx-88940449	GG	GG	GG	GG	GG	GG	AA	AA	AA	AA	AA	AA
Affx-88916434	CC	CC	CC	CC	CC	CC	AA	AA	AA	AA	AA	AA
Affx-88928255	CC	CC	CC	CC	CC	CC	TT	TT	---	TT	TT	TT
Affx-88918127	AA	GG	AA	AA	AA	AA	GG	GG	GG	GG	GG	GG
Affx-88959950	AA	AA	AA	AA	AA	AA	GG	GG	GG	GG	GG	GG
Affx-88919998	GG	GG	GG	GG	GG	GG	CC	CC	CC	CC	CC	CC
Affx-88926967	CC	CC	CC	CC	CC	CC	AA	AA	AA	AA	AA	AA
Affx-88905602	AA	AA	AA	AA	AA	AA	GG	GG	GG	GG	GG	GG
Affx-88947392	AA	AA	AA	AA	AA	AA	CC	CC	CC	CC	CC	CC
Affx-88940411	GG	GG	GG	GG	GG	GG	AA	AA	AA	AA	AA	AA
Affx-88922883	CC	CC	CC	CC	CC	CC	TT	TT	TT	TT	TT	TT
Affx-88948091	TT	TT	TT	TT	TT	TT	CC	CC	CC	CC	CC	CC
Affx-88916711	GG	GG	GG	GG	GG	GG	TT	TT	TT	TT	TT	TT
Affx-88953554	AA	AA	AA	AA	AA	AA	GG	GG	GG	GG	GG	GG
Affx-88949099	AA	AA	AA	AA	GG	AA	GG	GG	GG	GG	GG	GG
Affx-88951126	GG	GG	GG	GG	GG	GG	TT	TT	TT	TT	TT	TT
Affx-88938887	TT	TT	TT	TT	TT	TT	GG	GG	GG	GG	GG	GG
Affx-88933110	AA	AA	AA	AA	AA	AA	GG	GG	GG	GG	GG	GG
Affx-88923944	AA	AA	AA	AA	AA	AA	GG	GG	GG	GG	GG	GG
Affx-88948101	TT	TT	TT	TT	CC	TT	CC	CC	CC	CC	CC	CC
Affx-88958082	CC	CC	CC	CC	CC	CC	TT	TT	TT	TT	TT	TT
Affx-88951533	TT	TT	TT	TT	TT	TT	CC	CC	CC	CC	CC	CC
Affx-88960032	TT	TT	TT	---	TT	TT	GG	GG	GG	GG	GG	GG
Affx-88904687	GG	GG	GG	GG	GG	GG	TT	TT	TT	TT	TT	TT
Affx-88940427	AA	AA	AA	AA	GG	AA	GG	GG	GG	GG	GG	GG
Affx-88916812	TT	TT	TT	TT	CC	TT	CC	CC	CC	CC	CC	CC
Affx-88929760	AA	AA	AA	AA	AA	AA	CC	CC	CC	CC	CC	CC
Affx-88933940	CC	CC	CC	CC	---	CC	---	TT	TT	TT	TT	TT
Affx-88936121	AA	AA	AA	AA	AA	AA	CC	CC	CC	CC	CC	CC
Affx-88907642	CC	CC	CC	CC	CC	CC	AA	AA	AA	AA	AA	AA
Affx-88955342	GG	GG	GG	GG	GG	GG	AA	AA	AA	AA	AA	AA
Affx-88920514	AA	AA	AA	AA	AA	AA	GG	GG	GG	GG	GG	GG
Affx-88942177	AA	AA	AA	AA	AA	AA	CC	CC	CC	CC	CC	CC
Affx-88934513	GG	GG	GG	GG	GG	GG	TT	TT	TT	TT	TT	TT
Affx-88951119	CC	CC	CC	CC	CC	CC	AA	AA	AA	AA	AA	AA
Affx-88939477	CC	CC	CC	CC	TT	CC	TT	TT	TT	TT	TT	TT
Affx-88943394	AA	AA	AA	AA	AA	AA	CC	CC	CC	CC	CC	CC
Affx-88921960	TT	TT	TT	TT	TT	TT	CC	CC	CC	CC	CC	CC
Affx-88945305	TT	TT	TT	TT	TT	TT	CC	CC	CC	CC	CC	CC
Affx-88925991	AA	AA	AA	AA	AA	AA	GG	GG	GG	GG	GG	GG
Affx-88951321	AA	AA	AA	AA	AA	AA	GG	GG	GG	GG	---	GG
Affx-88958166	TT	TT	TT	TT	TT	TT	GG	GG	GG	GG	GG	GG
Affx-88923316	TT	TT	GG	TT	TT	TT	GG	GG	GG	GG	GG	GG
Affx-88907437	AA	AA	GG	GG	AA	AA	GG	GG	GG	GG	GG	GG
Affx-88936853	AA	AA	AA	AA	AA	AA	GG	GG	GG	GG	GG	GG
Affx-88915796	GG	GG	GG	GG	GG	GG	AA	AA	AA	AA	AA	AA
Affx-88942956	AA	AA	AA	AA	AA	AA	GG	GG	GG	GG	GG	GG
Affx-88946657	TT	TT	TT	TT	TT	TT	CC	CC	CC	CC	CC	CC
Affx-88925922	AA	AA	AA	AA	AA	AA	GG	GG	GG	GG	GG	GG
Affx-88919689	TT	TT	TT	TT	TT	TT	GG	GG	GG	GG	GG	GG
Affx-88911303	GG	GG	GG	GG	GG	GG	AA	AA	AA	AA	AA	AA
Affx-88925416	AA	AA	AA	AA	AA	AA	GG	GG	GG	GG	GG	GG
Affx-88905603	TT	TT	TT	TT	TT	TT	CC	CC	CC	CC	CC	CC
Affx-88926366	AA	AA	AA	AA	AA	AA	CC	CC	CC	CC	CC	CC
Affx-88927441	CC	CC	CC	CC	CC	CC	TT	TT	TT	TT	TT	TT
Affx-88936514	TT	TT	TT	TT	TT	TT	CC	CC	CC	CC	CC	CC
Affx-88948406	AA	AA	AA	AA	AA	AA	CC	CC	CC	CC	CC	CC
Affx-88955972	TT	TT	TT	TT	TT	TT	CC	CC	CC	CC	CC	CC
Affx-88938919	TT	TT	TT	TT	TT	TT	GG	GG	GG	GG	GG	GG
Affx-88938925	TT	TT	TT	TT	TT	TT	CC	CC	CC	CC	CC	CC
Affx-88946102	GG	GG	GG	GG	GG	GG	AA	AA	AA	AA	AA	AA
Affx-88941008	CC	CC	CC	CC	CC	CC	TT	TT	TT	TT	TT	TT
Affx-88922265	GG	GG	GG	GG	GG	GG	TT	TT	TT	TT	TT	TT
Affx-88916780	AA	AA	AA	AA	GG	AA	GG	GG	GG	GG	GG	GG
Affx-88912642	TT	TT	TT	TT	TT	TT	GG	GG	GG	GG	GG	GG
Affx-88927389	TT	---	TT	TT	TT	TT	CC	CC	CC	CC	CC	CC
Affx-88938158	TT	TT	TT	TT	TT	TT	CC	CC	CC	CC	CC	CC
Affx-88942395	GG	GG	GG	GG	GG	GG	AA	AA	AA	AA	AA	AA
Affx-88929604	GG	GG	GG	GG	GG	GG	AA	AA	AA	AA	AA	AA
Affx-88905772	AA	AA	AA	AA	AA	AA	CC	CC	CC	CC	CC	CC
Affx-88926612	AA	AA	AA	AA	AA	AA	CC	CC	CC	CC	CC	CC
Affx-88935348	GG	GG	GG	GG	GG	GG	AA	AA	AA	AA	AA	AA
Affx-88927596	CC	CC	CC	CC	CC	CC	TT	TT	TT	TT	TT	TT
Affx-88952022	CC	CC	CC	CC	CC	CC	TT	TT	TT	TT	TT	TT
Affx-88937860	GG	GG	GG	GG	GG	GG	AA	AA	AA	AA	AA	AA
Affx-88925784	TT	TT	TT	TT	TT	TT	GG	GG	GG	GG	GG	GG
Affx-88940598	TT	TT	TT	TT	TT	TT	CC	CC	CC	CC	CC	CC
Affx-88909993	AA	AA	AA	AA	AA	AA	GG	GG	GG	GG	GG	GG
Affx-88935868	TT	TT	CC	TT	TT	TT	CC	CC	CC	CC	CC	CC
Affx-88932739	TT	TT	TT	TT	TT	TT	CC	CC	CC	CC	CC	CC
Affx-88931933	GG	GG	GG	GG	GG	GG	TT	TT	TT	TT	TT	TT
Affx-88942794	TT	TT	TT	TT	TT	TT	CC	CC	CC	CC	CC	CC
Affx-88950023	CC	CC	CC	CC	CC	CC	TT	TT	TT	TT	TT	TT
Affx-88953041	AA	AA	AA	AA	AA	AA	GG	GG	GG	GG	GG	GG
Affx-88954720	GG	GG	GG	GG	GG	GG	AA	AA	AA	AA	AA	AA
Affx-88913795	TT	TT	TT	TT	TT	TT	CC	CC	CC	CC	CC	CC
Affx-88940989	GG	GG	GG	GG	GG	GG	TT	TT	TT	TT	TT	TT
Affx-88946640	CC	CC	CC	CC	CC	CC	AA	AA	AA	AA	AA	AA
Affx-88939692	AA	AA	AA	AA	---	AA	GG	GG	GG	GG	GG	GG
	Rearranged	Rearranged	Rearranged	Rearranged	Rearranged	Rearranged	Ancestral	Ancestral	Ancestral	Ancestral	Ancestral	Ancestral
